# Supplementary material for: The effect of MFI zeolite lamellar and related mesostructures on toluene disproportionation and alkylation
Source: Royal Society of Chemistry journal article supplement (doi:10.1039/c3cy00146f), 2013-01-01
Supplement: c3cy00146f.pdf [file c3cy00146f.pdf]

## SUPPLEMENTARY INFORMATION TO THE MANUSCRIPT

### THE EFFECT OF ZEOLITE LAMELLAR MORPHOLOGY AND ACIDITY ON TOLUENE DISPROPORTIONATION AND ALKYLATION

Changbum Jo<sup>a,b</sup>, Ryong Ryoo<sup>a,b</sup>, Naděžda Žilková<sup>c</sup>, Dana Vitvarová<sup>c</sup> and Jiří Čejka<sup>c</sup>

<sup>a</sup> Center for Nanomaterials and Chemical Reactions, Institute for Basic Science, Daejeon 305-701, Korea

<sup>b</sup> Department of Chemistry, KAIST, Daejeon 305-701, Korea

<sup>c</sup> J. Heyrovský Institute of Physical Chemistry, Academy of Sciences of the Czech Republic, v.v.i., Dolejškova 3, CZ-182 23 Prague 8, Czech Republic

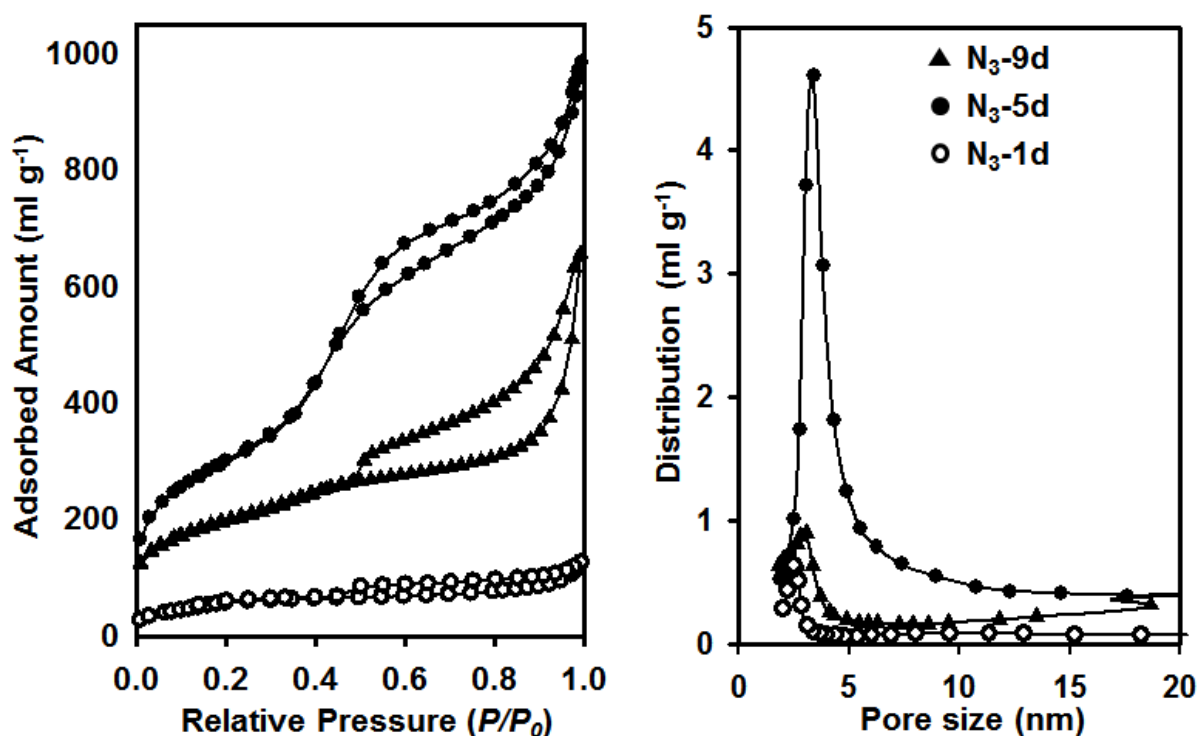

**Figure SI-1** (a) N<sub>2</sub> adsorption isotherm and (b) BJH mesopore size distribution of the N<sub>3</sub>-1d (white circle), N<sub>3</sub>-5d (black circle) and N<sub>3</sub>-9d (triangle)

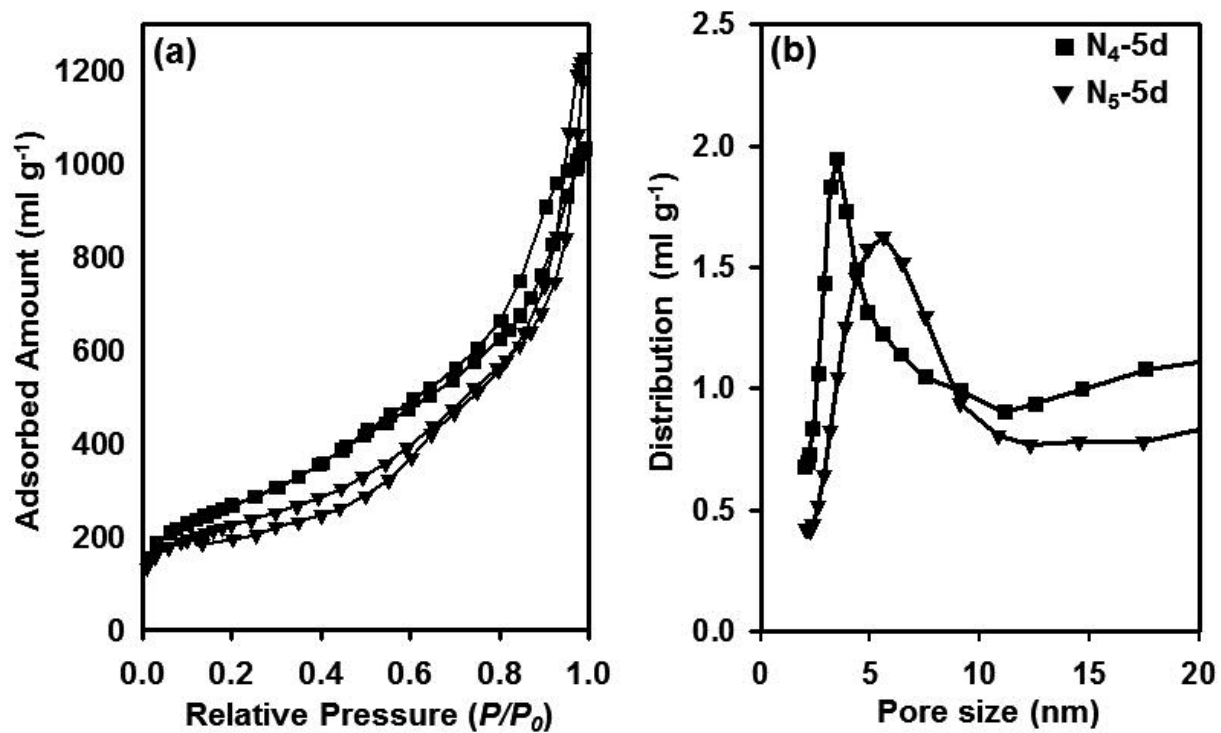

**Figure SI-2** (a)  $N_2$  adsorption isotherm and (b) BJH mesopore size distribution of the  $N_4$ -5d (square) and  $N_5$ -5d (inverted triangle)

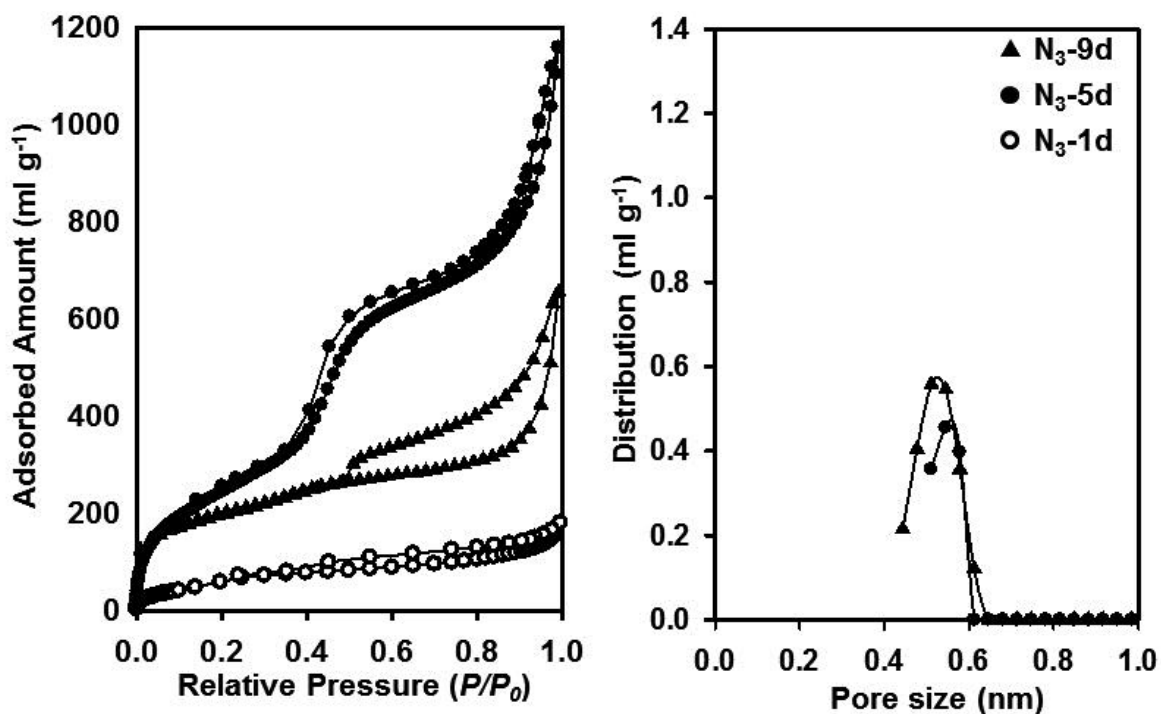

**Figure SI-3** (a) Ar adsorption isotherm and (b) NLDFT micropore size distribution of the N<sub>3</sub>-1d (white circle), N<sub>3</sub>-5d (black circle) and N<sub>3</sub>-9d (triangle).

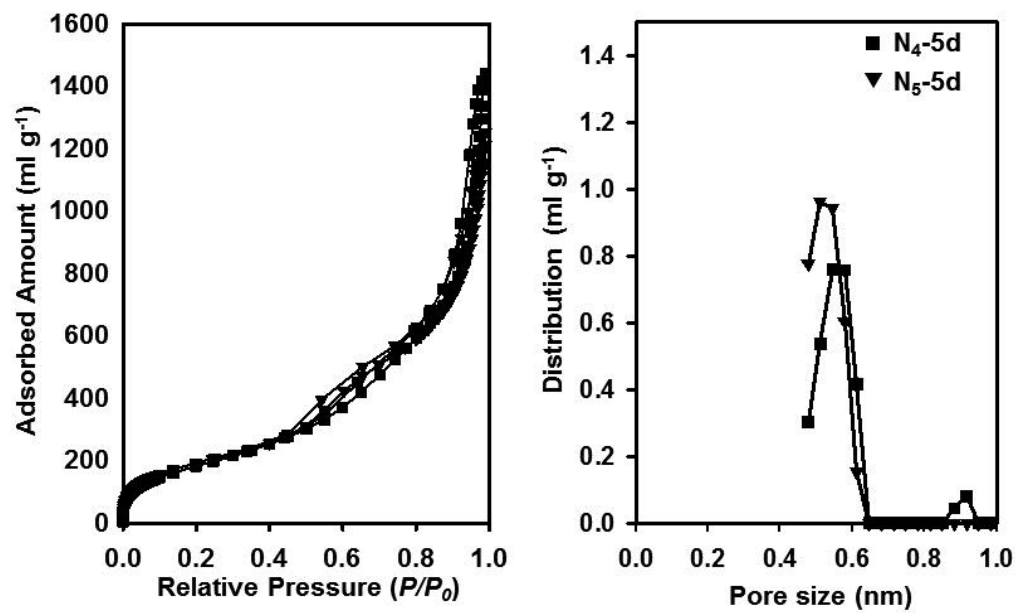

**Figure SI-4** (a) Ar adsorption isotherm and (b) NLDFT micropore size distribution of the N<sub>4</sub>-5d (square) and N<sub>5</sub>-5d (inverted triangle)

**Figure SI-5** Low magnification TEM images for N<sub>3</sub>-5d

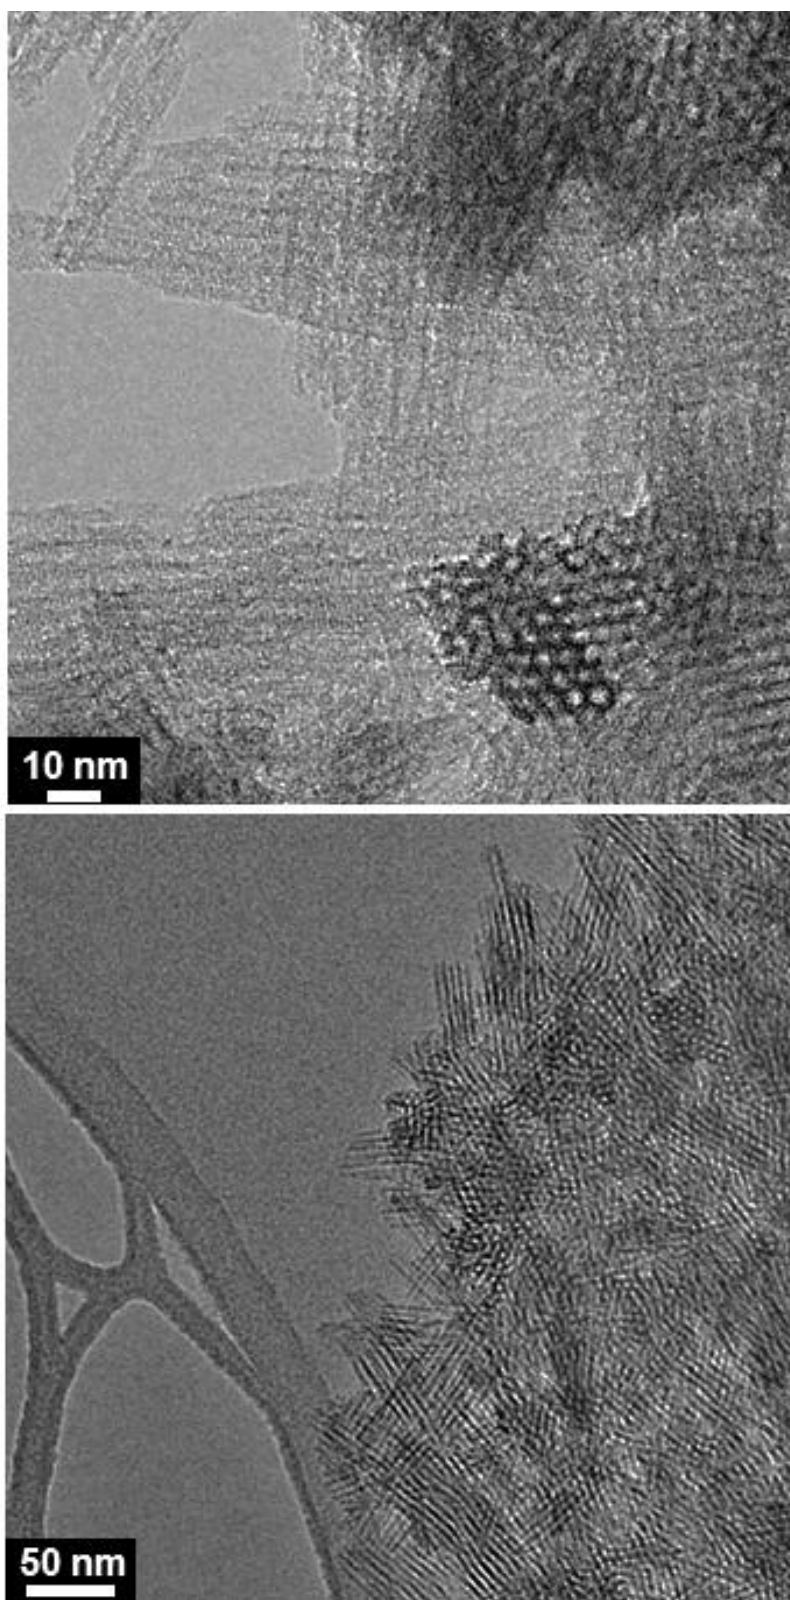

**Figure SI-6** Low magnification TEM images for N<sub>3</sub>-9d

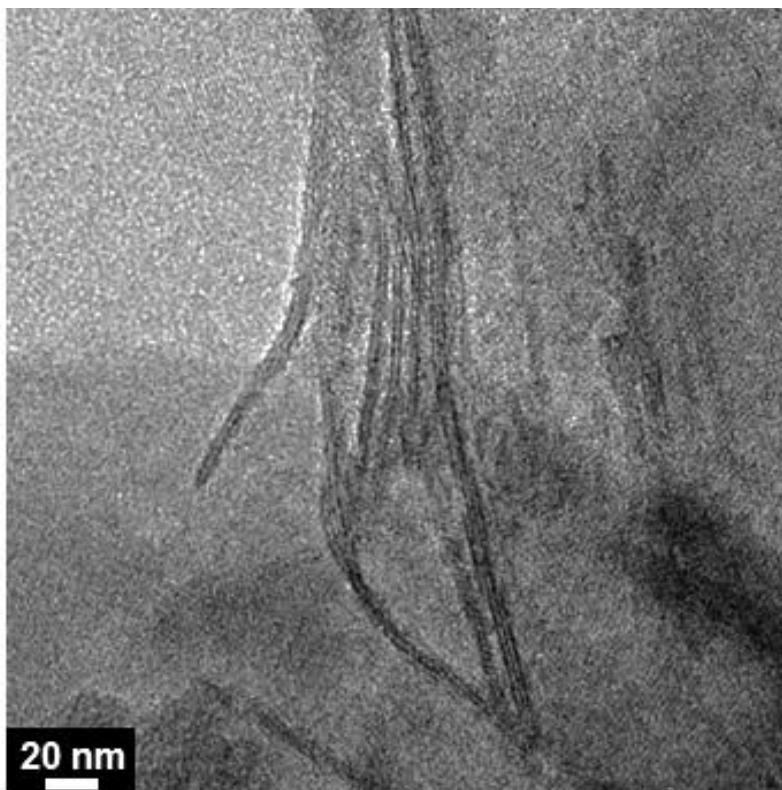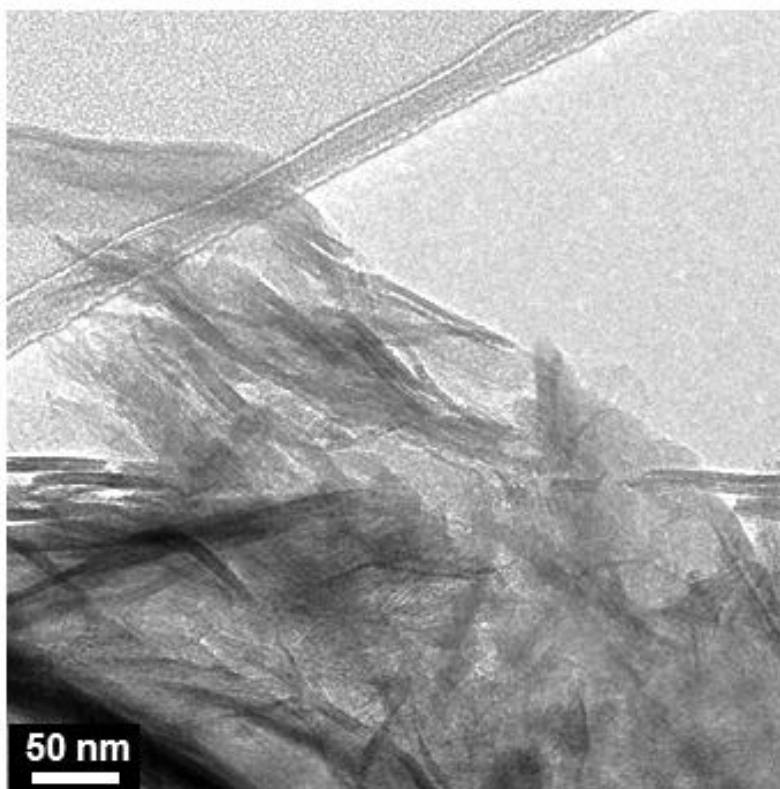

**Figure SI-7** Low magnification TEM images for N<sub>4</sub>-5d

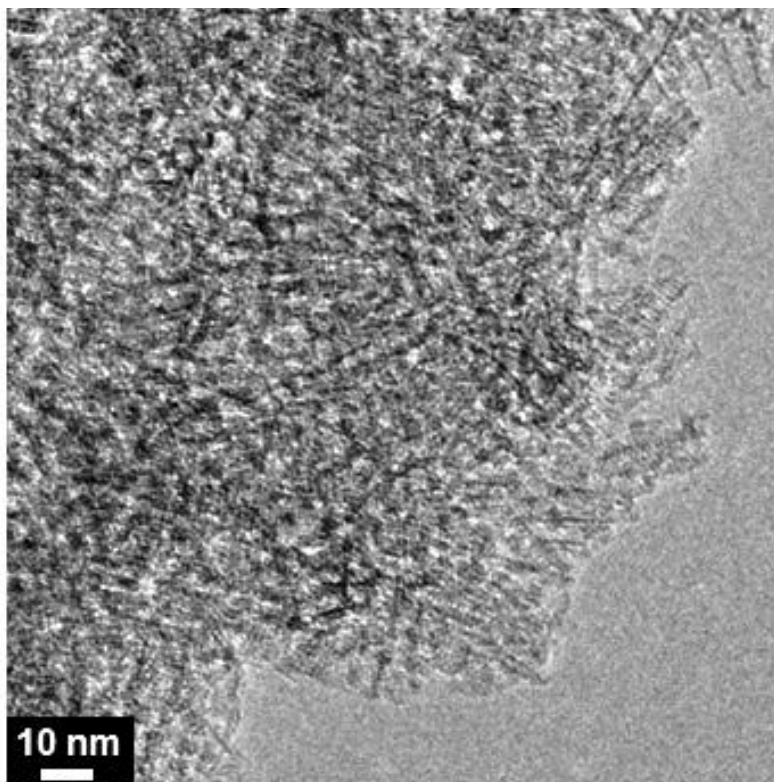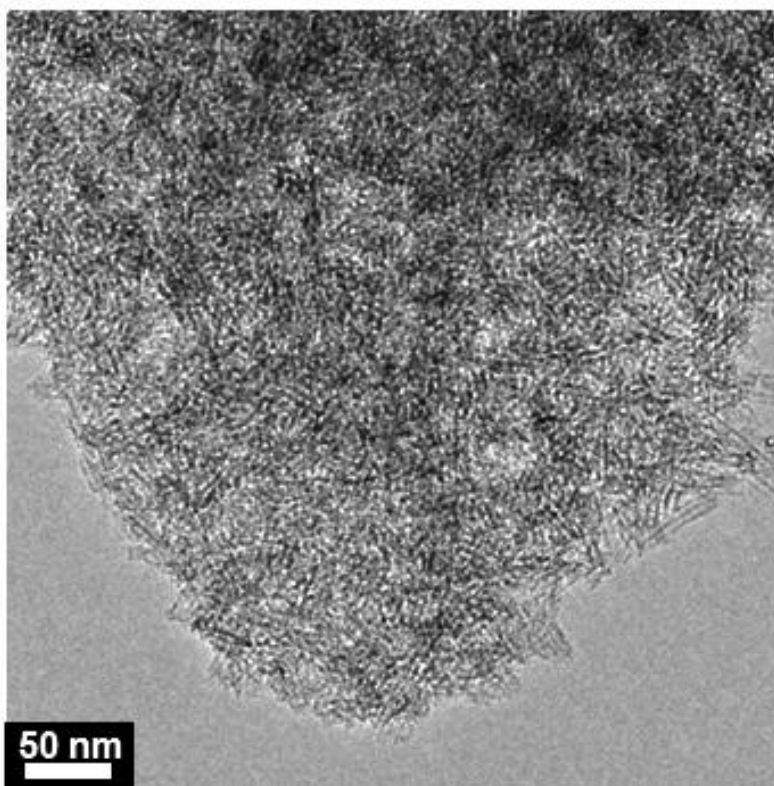

**Figure SI-8** Low magnification TEM images for N<sub>5</sub>-5d

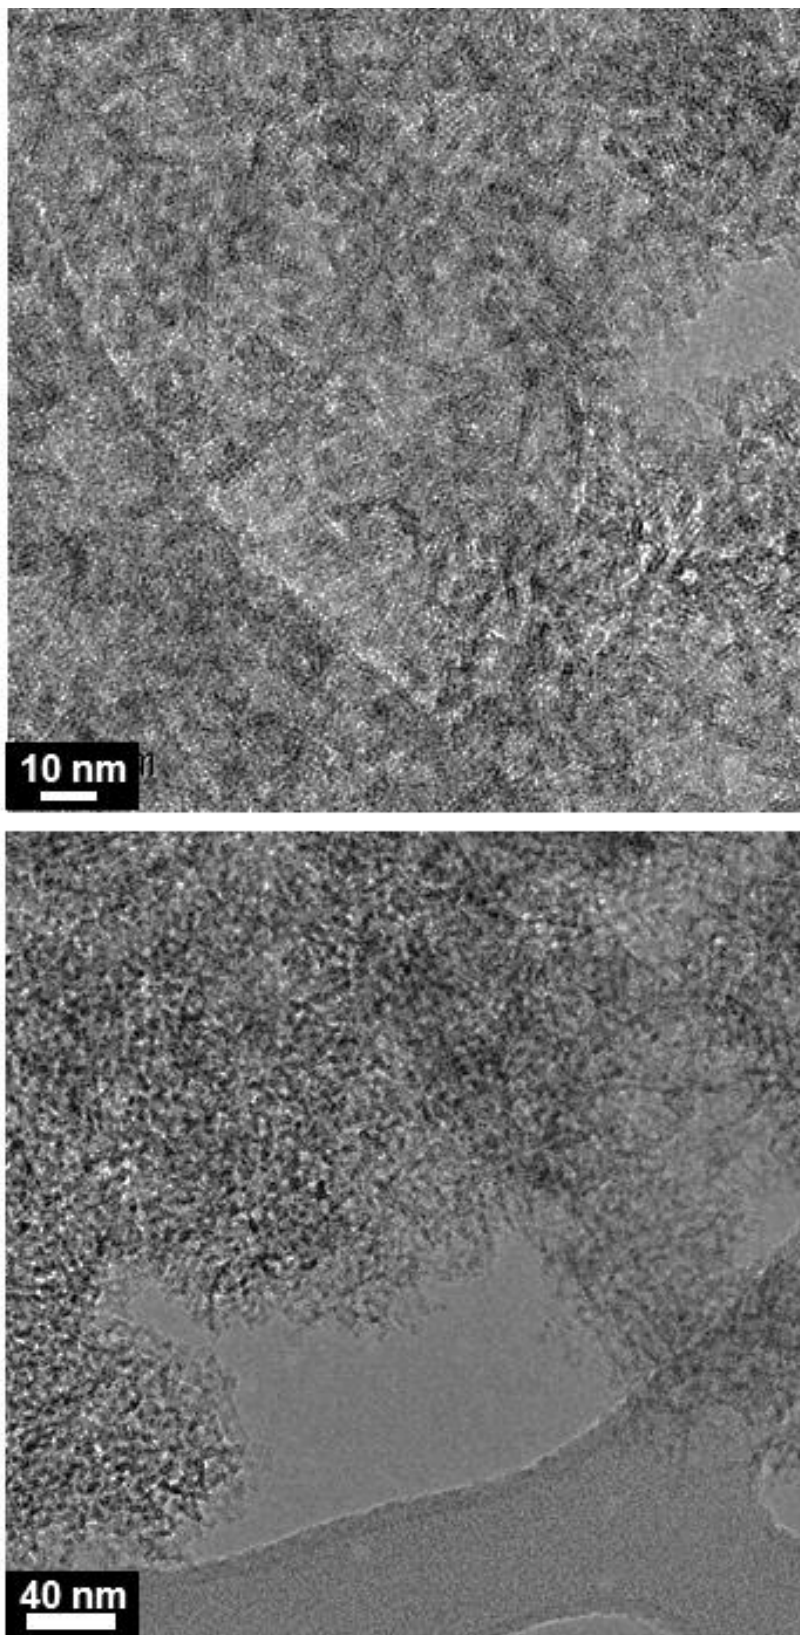



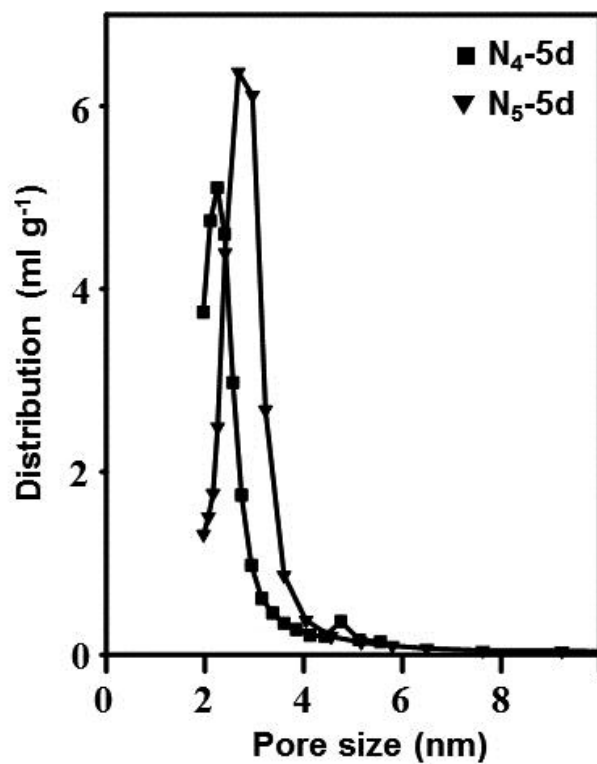

**Figure SI-9** Pore size distribution of carbon replicas of the N<sub>4</sub>-5d (square) and N<sub>5</sub>-5d (inverted triangle).
